1 Movement patterns and activity levels are shaped by the neonatal environment  
2 in Antarctic fur seal pups

3

4 Rebecca Nagel <sup>1</sup>, Sina Mews <sup>2</sup>, Timo Adam <sup>2,3</sup>, Claire Stainfield <sup>4</sup>, Cameron Fox-Clarke <sup>4</sup>,  
5 Camille Toscani <sup>4</sup>, Roland Langrock <sup>2</sup>, Jaume Forcada <sup>4\*</sup>, Joseph I. Hoffman <sup>1,4\*</sup>

6

7 1. Department of Animal Behaviour, Bielefeld University, 33501 Bielefeld, Germany

8 2. Department of Business Administration and Economics, Bielefeld University, 33501  
9 Bielefeld, Germany

10 3. Centre for Research into Ecological and Environmental Modelling, School of  
11 Mathematics and Statistics, The Observatory, Buchanan Gardens, University of St  
12 Andrews, KY16 9LZ, UK

13 4. British Antarctic Survey, High Cross, Madingley Road, Cambridge CB3 0ET, UK

14

15 \* Joint senior authors

16

17 Corresponding author: Rebecca Nagel, [rebecca.nagel@uni-bielefeld.de](mailto:rebecca.nagel@uni-bielefeld.de), Department of  
18 Animal Behaviour, Bielefeld University, 33501 Bielefeld, Germany

19 **Abstract**

20 Tracking studies of juveniles are rare compared to those of adults and consequently, little is  
21 known about the influence of intrinsic and extrinsic factors on activity during this critical life  
22 stage. We therefore collected GPS data from birth until moult from 66 Antarctic fur seal pups  
23 in two nearby but contrasting breeding colonies. The Special Study Beach (SSB) is a high-  
24 density colony separated from the inland tussock grass habitat by a steep gully, whereas  
25 Freshwater Beach (FWB) is a low-density colony that is topographically more open. We  
26 investigated the explanatory power of multiple individual-based and environmental variables  
27 using a hidden Markov model. We found that activity was typified by central place  
28 exploration, with directed movement away from and subsequent return to a location of low  
29 activity. The probability of such directed exploration was unaffected by several factors known  
30 to influence marine mammal movement including sex, body condition and temperature.  
31 Conversely, FWB pups were more active, increased their activity with age and transitioned  
32 earlier into the tussock grass, which offers protection from predators and extreme weather.  
33 Our study illustrates the profound importance of extrinsic factors to early movement and  
34 highlights the adaptive potential of movement in the face of environmental variability.

35

36 **Keywords**

37 Activity, animal movement, fur seal, GPS, hidden Markov model (HMM), pinniped

## 38 **Introduction**

39 Movement is a defining characteristic of life, and it underpins critical components of  
40 behaviour [1] and fitness [2]. Understanding how animals adapt their movement in response  
41 to external and internal stimuli is therefore fundamental to the management and conservation  
42 of wild populations [1,3]. Rapid advancements in bio-logging technology and the increased  
43 accessibility of statistical tools for drawing meaningful inference from fine-scaled  
44 observations has led to unprecedented insights into the movement of a variety of species in  
45 their natural habitats [4,5]. Marine vertebrates in particular have benefited from such  
46 improved methodologies, exemplified by a recent analysis of more than 2,600 tracked  
47 individuals documenting extraordinary convergence in movement patterns across 50 species  
48 [6].

49 Despite these advancements, several authors have drawn attention to age and sex  
50 biases in the literature, with datasets of adult females being particularly over-represented  
51 [3,7]. This focus on adults is problematic because the movement and distribution of neonatal  
52 and juvenile individuals is of key importance for understanding population dynamics. For  
53 example, long-term monitoring of three albatross species has shown that high rates of juvenile  
54 mortality due to interactions with fisheries are likely driving observed declines in population  
55 size [8]. Similarly, loggerhead sea turtles occupy distinct oceanic environments as juveniles,  
56 making them more susceptible to bycatch on pelagic longlines [9].

57 In addition to informing conservation efforts, studies of the movement of young  
58 individuals can also provide valuable insights into the ontogeny of social and survival skills.  
59 A tracking study of European shags, for example, has shown that higher rates of juvenile  
60 mortality correlate with poor foraging proficiency [10], highlighting the importance of  
61 learning and memory for successful recruitment. Studies of several different pinniped species  
62 including Antarctic fur seals [11], New Zealand sea lions [12], Steller sea lions [13], northern  
63 fur seals [14] and grey seals [15] have also shown that sex-specific differences in foraging and  
64 diving behaviour become established early in life, implying that intrinsic factors may  
65 outweigh size-related effects associated with early sexual dimorphism on habitat choice.

66 These and other studies represent an important step forward in the field of movement  
67 ecology because they help to close the gap between adult movement and the ‘lost years’ of  
68 juveniles [3]. However, with few exceptions, studies of juveniles have focused on the period  
69 after nutritional independence. While this can be justified for many birds and other species  
70 where neonates are more or less stationary until weaned, in many other species movement  
71 behaviour and social interactions among conspecifics earlier in life play a key role in

72 development. For example, play behaviour in pre-weaned Stellar sea lions and Galápagos fur  
73 seals facilitates the development of muscle mass and hones fighting skills that are important  
74 for future foraging and reproductive success [16,17].

75 Antarctic fur seals (*Arctocephalus gazella*) are another pinniped species where  
76 neonatal movement may play an important role in early development. Newborn pups are  
77 regularly left unattended in dense rookeries while their mothers, who are central place  
78 foragers, intersperse short periods of nursing on land with longer foraging trips at sea [18].  
79 Without their mothers to defend them, pups are at an increased risk of predation from  
80 predatory birds [19] and traumatic injury due to crushing by territorial males [20,21].  
81 Furthermore, the natal coat of pups lacks the water-repellent properties of adult fur [22],  
82 which prevents them from spending prolonged time at sea, so pups can only begin to develop  
83 the efficient swimming and diving behaviour necessary for nutritional independence after they  
84 moult at around 60 days of age [23,24]. Anecdotal observations of pups venturing into  
85 shallow pools and streams shortly after birth [23] and the emergence of sex-specific  
86 differences in habitat use later in life [25] provide some insights into pup activity, but we still  
87 know surprisingly little about the intrinsic and extrinsic factors that may shape pup movement  
88 prior to moulting.

89 Here, we analysed hourly GPS data from 66 Antarctic fur seal pups tracked from birth  
90 until moulting (Figure 1) using a hidden Markov model. Focal individuals were selected at  
91 random from two breeding colonies, the “Special Study Beach” (SSB) and “Freshwater  
92 Beach” (FWB), which are separated by around 200 meters. Because of their close proximity,  
93 these colonies experience comparable climatic conditions and breeding females from both  
94 locations likely forage in the same area [26], which is reflected by the fact that they do not  
95 differ significantly in quality traits such as body size or condition [27]. However, the density  
96 of animals is higher at SSB than at FWB [27]. This creates a different dynamic, first because  
97 tightly packed males at SSB have little freedom to move, resulting in a more static system  
98 [28], and second because avian predators are better able to penetrate low density breeding  
99 aggregations on FWB, leading to a greater likelihood of pups being predated [27]. The two  
100 colonies also differ in their size and topology. SSB is somewhat smaller and relatively  
101 ‘closed’ as a steep gully separates the beach from the tussock grass immediately inland, while  
102 FWB is flatter and consequently more ‘open’.

103 We used these two colonies as a ‘natural experiment’ to investigate the influence of  
104 the early neonatal environment on fur seal movement, as well as to evaluate the relative  
105 importance of extrinsic versus intrinsic factors such as sex, age and body condition.

106 Furthermore, as the number of breeding individuals, foraging trip durations and pup birth  
107 weights vary appreciably from year to year depending on local food abundance [29], we  
108 replicated our study across two consecutive seasons of contrasting food availability [27]. We  
109 hypothesised that (i) intrinsic and extrinsic factors shown in previous studies to influence  
110 movement in pinnipeds, including sex [30–32], body condition [33] and ambient temperature  
111 [34–36], will also affect the movement of Antarctic fur seal neonates, (ii) activity levels and  
112 movement patterns will be influenced by density, with FWB pups being more active to avoid  
113 predation, and (iii) levels of pup activity will increase with age, as there is likely strong  
114 selection for the early development of motor skills and lean muscle mass.

## 115 **Methods**

### 116 *Field methods*

117 This study was conducted at two breeding colonies on Bird Island, South Georgia  
118 (54°00'24.8" S, 38°03'04.1" W; Figure 2a) during the austral summers (December to  
119 March) of 2018 – 19 (hereafter referred to as 2019) and 2019 – 20 (hereafter referred to as  
120 2020). The first of these years was among the worst on record in terms of breeding female  
121 numbers, pup birth weights and maternal foraging trip durations [27], implying that 2019 was  
122 a year of unusually low food abundance [29,37,38].

123 In both seasons, 25 Antarctic fur seal pups from each colony were captured two to  
124 three days after birth (December) and every ten days thereafter until they began to moult  
125 (March). Individuals were randomly selected with respect to sex and birth date during the  
126 pupping period. Capture, restraint and handling of pups followed protocols established over  
127 36 consecutive years of the long-term monitoring and survey program of the British Antarctic  
128 Survey (BAS). Briefly, pups were captured with a slip noose or by hand and were restrained  
129 by hand. After handling, pups were returned to their mothers or released as close to their  
130 capture sites as possible. At every capture, weight and length measurements were taken, from  
131 which a scaled mass index was calculated according to Peig and Green [39]. This condition  
132 metric serves as a reliable indicator of overall fitness as it has been correlated with mortality  
133 [40] and reproductive success [41] in a variety of species.

134 To facilitate the tracking and recapture of focal individuals, VHF transmitters (Sirtrack  
135 core marine glue-on V2G 152A; dimensions: 40 x 20 x 10 mm body with a 200 mm antenna,  
136 weight: 16 g) were attached to the dorsal side of the neck between the shoulder blades with  
137 epoxy glue. Pups were similarly fitted with GPS loggers in waterproof ABS plastic enclosures  
138 (Perthold Engineering CatLog Gen2 GPS Loggers; dimensions: 50 x 40 x 17 mm, weight: 36  
139 g), which recorded latitude and longitude positions every hour from birth until moulting of the  
140 pelage (Figure 1). Together, these two tags accounted for less than 1% of the mean focal pup  
141 mass at first capture (5.6 kg). Temporary bleach marks (Clairol Nice'n Easy Borne Blonde  
142 Permanent Hair Color) applied to the fur were used to identify pups. Unrecovered tags ( $n =$   
143 12) and bleach marks are shed naturally when the seals moult (March – April), precluding any  
144 long-term consequences for the pups.

145 As part of the BAS contribution to the Ecosystem Monitoring Programme of the  
146 Convention for the Conservation of Antarctic Marine Living Resources (CCAMLR), the  
147 attendance behaviour of breeding females has been monitored since 1982, with radio  
148 telemetry protocols established in 1992 to track around 25 adult females per season on FWB.

149 We contributed towards this ongoing effort by attaching VHF transmitters (Sirtrack core  
150 marine glue-on V2G 154C; dimensions: 65 x 28 x 13 mm body with a 250 mm antenna,  
151 weight: 42 g) to the mothers of our focal FWB pups. Adult females were captured with a  
152 noosing pole and held on a restraint board. Daily attendance was monitored using a fixed-  
153 position radio antenna (Televilt RX900) combined with visual checks of the island with a  
154 hand-held VHF receiver (AOR Ltd., AR8200). The daily absence or presence of females  
155 ashore was noted from first capture until the final measurement, when the pups either moulted  
156 or died. Mothers were fitted with cattle ear tags (Dalton Supplies, Henley on Thames, UK) in  
157 the trailing edge of each fore flipper [42] for identification.

158

### 159 *Data analysis framework*

160 Within our dataset, hourly GPS data were successfully collected from a total of 66  
161 Antarctic fur seal pups (breakdown by season:  $n = 40$  in 2019 and  $n = 26$  in 2020; by colony:  
162  $n = 32$  at FWB and  $n = 34$  at SSB). The majority of tracked individuals ( $n = 53$ , or 80%)  
163 survived until weaning. For those individuals that died, we truncated the GPS data back to the  
164 last time point that the animal was seen alive prior to analysis.

165 Our GPS data contained some missing locations, which in a handful of cases led to  
166 observation gaps of several hours. Most if not all missing values likely arose due to signal  
167 lapse, which occurs when the satellite connection to a GPS device is interrupted due to cloud  
168 cover, physical obstruction, etc. [43]. In an otherwise regular sequence, such missing data are  
169 manageable, but large gaps may introduce bias into the model [44]. Therefore, for  
170 observational gaps exceeding four hours, we split the individual's track into separate bursts or  
171 intervals of continuous data. Bursts that were shorter than 48 hours usually contained a  
172 considerable amount of missing observations and were therefore excluded from the analysis,  
173 corresponding to roughly 2% of the full dataset including missing locations. Overall, the  
174 tracks of 35 individuals were split into two to five bursts, while data from all other individuals  
175 ( $n = 31$ ) consisted of a single burst.

176 Our final dataset contained 67,417 hourly observations with a median number of 1,124  
177 observations per individual (min = 88, max = 1,916). The step lengths (in meters) between  
178 consecutive GPS locations were calculated and screened for implausible movements. We set  
179 all values larger than 400 meters/hour (corresponding to 297 observations) to be missing. This  
180 is in accordance with Jones *et al.* [25], who found that 300 meters was the maximum distance  
181 Antarctic fur seal pups younger than 50 days of age travelled.

182 To investigate environmental factors influencing pup movement, hourly dry bulb air  
183 temperature and wind speed measurements for Bird Island were obtained from the BAS  
184 Meteorology and Ozone Monitoring Programme, and missing values (85 observations) were  
185 linearly interpolated. The binary variables sex (with female as the reference category) and  
186 season (with 2019 as the reference category) were held constant for each individual. The  
187 continuous variables age (measured in days since initial capture, two to three days after birth)  
188 and scaled mass index (calculated every ten days) were kept constant between days and  
189 measurements. All metric variables were standardised. All analyses and visualisations for this  
190 study were implemented in R version 4.0.2 [45] using the integrated development  
191 environment RStudio [46].

192

### 193 *Hidden Markov models*

194 To investigate the explanatory power of environmental and individual-based variables  
195 on pup movement, we fitted a hidden Markov model (HMM) to the hourly GPS data. This  
196 time series model encompasses both the observed movement of an individual and an  
197 underlying ('hidden') state sequence, which is used to infer behavioural processes (e.g. active/  
198 inactive) [5]. HMMs have accordingly been used to analyse animal tracking data in relation  
199 to, among others, environmental conditions [47], anthropogenic activity [48], sex [49],  
200 ontogeny [50] and individualised niches [51].

201 To distinguish between different behavioural processes in Antarctic fur seal pups, we  
202 fitted HMMs to the hourly observed step lengths. We assumed the observation process to be  
203 the same for all individuals and modelled the step lengths using a gamma distribution,  
204 conditional on the states. Prior to building a final model, we conducted exploratory analyses  
205 on the number of states and compared univariate HMMs to bivariate HMMs additionally  
206 including the turning angle between consecutive GPS locations (see Supplementary Material  
207 S3 for more details). We restricted our final analysis to a parsimonious univariate HMM with  
208 two states as the inclusion of the turning angle as well as additional states resulted in a  
209 negligible improvement of model fit while complicating the interpretation of the underlying  
210 states [52]. To check whether the HMMs based on hourly data adequately reflect the animals'  
211 movement behaviour, we also fitted an HMM to five-minute interval GPS data collected from  
212 three fur seal pups, each between 30 – 50 days of age, for 13 – 19 days (mean = 3,965 data  
213 points). The results showed that with the coarser temporal resolution (hourly data) there was  
214 no relevant loss of information on pup activity with respect to the aims of the study (see  
215 Supplementary Material S4 for more details).



216 We further investigated the effects of external and internal factors – including colony,  
217 season, time of day, temperature, wind speed, sex, age and body condition – on the activity  
218 level of fur seal pups by modelling state transition probabilities as a function of the covariates  
219 using a logit link function. We allowed the effects of the covariates to differ between the two  
220 colonies by including interaction terms with the binary covariate ‘colony’ (FWB/SSB). To  
221 account for the periodic nature of time of day, its effect was modelled using trigonometric  
222 functions. To assess the relative importance of the covariates, we calculated the differences in  
223 AIC values between the full model and models sequentially excluding each covariate and its  
224 interaction with colony. All HMMs were fitted by numerically maximising the likelihood  
225 using *moveHMM* [44]. To further investigate model fit, we calculated pseudo-residuals and  
226 checked them for normality and autocorrelation [5]. Based on the full model, we inferred the  
227 most likely underlying state sequence using the Viterbi algorithm [5]. We also calculated the  
228 state occupancy probabilities as a function of each covariate [53], while fixing the other  
229 covariates to their respective means or reference categories.

230

### 231 *Post-hoc analyses*

232 The HMM decomposed the GPS data into two distinct states, which we inferred as  
233 ‘inactive’ and ‘active’ movement (see Results for more details). To determine whether  
234 additional variables that we were not able to include in the HMM explain a significant  
235 proportion of variation in activity, we built two generalised linear mixed models (GLMMs)  
236 *post-hoc*. In our first model, we included maternal attendance (0 = present ashore, 1 = absent)  
237 as the explanatory variable. As data on maternal attendance were only available for pups born  
238 on FWB, this covariate could not be included in the full HMM, which defined an interaction  
239 term between all covariates and ‘colony’. In our second model, we used the survival status of  
240 each pup (0 = died, 1 = survived) as the explanatory variable. Here, we wanted to test for an  
241 association between survival status and movement without assuming the direction of  
242 causality. In both models, pup ID was included as a random effect to account for repeated  
243 measurements of individuals. The response variable was the inferred state of an individual (0  
244 = inactive, 1 = active) at a given time point and was modelled with a binomial error  
245 distribution using *lme4* [54]. The residuals of the models were visually inspected for linearity  
246 and equality of error variances (using plots of residuals versus fits), normality (using Q – Q  
247 plots) and over or under-dispersion (by comparing the dispersion of simulated to observed  
248 residuals) using *DHARMA* [55].

249

250 *Animal ethics and permits*

251           Animal handling was carried out by the British Antarctic Survey under permits from  
252 the Government of South Georgia and the South Sandwich Islands (Wildlife and Protected  
253 Areas Ordinance (2011), RAP permit numbers 2018/024 and 2019/032). All procedures used  
254 were approved by the British Antarctic Survey Animal Welfare and Ethics Review Body  
255 (AWERB applications 2018/1050 and 2019/1058).

## 256 **Results**

257           Hourly GPS data were successfully collected from a total of 66 Antarctic fur seal pups  
258 from two nearby but contrasting breeding colonies (Figure 2a). Deployment durations ranged  
259 from 20 to 80 days (median = 51 days) for the 53 surviving pups and from 4 to 41 days  
260 (median = 15 days) for the 13 pups that died. On average, pups travelled 43.9 meters per hour.  
261 In general, pup movement showed a star-like pattern characterised by directed exploration  
262 within a relatively small area around a central location of low activity (Figure 2b). However,  
263 the spatial distribution of these ‘home patches’ varied by colony. Pups born at FWB remained  
264 significantly closer to their natal colony (Wilcoxon rank sum test,  $p = 0.002$ ), traveling on  
265 average 87.6 meters into the tussock grass immediately inland. By contrast, pups born at SSB  
266 moved an average of 205.0 meters from their natal colony in a wider variety of directions  
267 (Figure 2c).

268

### 269 *Hidden Markov model: Activity patterns of fur seal pups*

270           The two states of the HMM were clearly discriminated from each other. State 1  
271 captured smaller step lengths (mean step length = 22.5 meters) corresponding to less active  
272 movement and is hereafter referred to as the ‘inactive state’. State 2 was characterised by  
273 more active behaviour covering longer distances (mean step length = 75.8 meters) and is  
274 hereafter referred to as the ‘active state’. Minimal differences between the marginal  
275 distribution under the fitted model and the empirical distribution as well as the analysis of  
276 pseudo-residuals suggest that our model provides a good fit to the data (see Supplementary  
277 Material S5 for more details). Based on the Viterbi-decoded state sequences, pups spent on  
278 average 65.2% (range = 45.7 – 97.3%) of their time in the inactive state and 34.8% (2.7 –  
279 54.3%) of their time in the active state. The pups’ decoded movement patterns are  
280 summarised in Figure 2b and representative examples of individual tracks are shown in  
281 Supplementary Figure S2.

282           Differences in AIC values (delta AIC) between the full model and HMMs sequentially  
283 excluding each variable and its interaction term with colony are shown in Table 1. We  
284 considered variables to be relevant for modelling pup activity levels if their delta AIC values  
285 were considerably larger than zero. Based on this criterion, the covariates year, time of day  
286 and age were determined to have the strongest effects on pup activity levels via both main  
287 effects and interactions with colony (Table 1). By contrast, air temperature, wind speed, sex  
288 and body condition had little to no influence on activity levels. Pups tended to be slightly  
289 more active in the first year of the study, particularly at FWB where the probability of

290 occupying the active state fell from 43.8% in 2019 to 34.0% in 2020. Activity levels also  
291 showed a clear diurnal pattern, peaking in the middle of the day in both colonies (Figure 3a  
292 and b). Finally, marked differences were observed in colony-specific developmental  
293 trajectories, with animals from FWB exhibiting an almost linear increase in activity with age  
294 (Figure 3c), whereas activity levels at SSB remained more or less constant throughout  
295 ontogeny (Figure 3d). FWB pups also tended to move inland into the tussock grass earlier  
296 than pups from SSB (Figures 3e and f).

297

### 298 *Post-hoc analyses*

299 To test additional hypotheses that could not be addressed in the HMM, we performed  
300 *post-hoc* logistic regression analyses to evaluate whether the presence of the mother ashore  
301 and the fate of the pup (died or survived until the end of the study) explained a significant  
302 proportion of the variation in pup activity levels ('states'). As expected, pups were  
303 significantly more active when their mothers were absent from Bird Island on foraging trips  
304 (Figure 4a; GLMM, estimate = 0.09, *s.e.* = 0.04, *p*-value = 0.03). More interestingly, the  
305 survival status of a pup was also significantly associated with activity (GLMM, estimate =  
306 0.758, *s.e.* = 0.19, *p*-value < 0.001), with pups that survived until weaning spending on  
307 average 34% more time in the active state (Figure 4b).

308 **Discussion**

309 We collected and analysed hourly GPS data from Antarctic fur seal pups tracked from  
310 birth until moulting in order to investigate the drivers of movement patterns and activity  
311 levels during this critical life stage. We found that pup movement was characterised by a star-  
312 like pattern, with individuals repeatedly returning to a central location of low activity after  
313 bouts of directed exploration. The HMM showed that the probability of such active movement  
314 was highest during the day and was mainly influenced by season, colony of birth and age. Our  
315 findings provide fresh insights into the movement patterns of pinnipeds prior to nutritional  
316 independence and highlight the importance of the life-history stage and the neonatal  
317 environment on behaviour.

318

319 *Movement in fur seal pups*

320 A recent study of movement in Antarctic fur seal pups found evidence for sex-specific  
321 differences in habitat use prior to nutritional independence and the onset of overt sexual size  
322 dimorphism. Specifically, male pups were found to exhibit more risk prone behaviour with  
323 increasing age, traveling further at sea and spending more time in exposed beach habitats  
324 [25]. While this study highlighted the importance of an intrinsic factor, sex, on neonatal  
325 movement, the contributions of other factors, both intrinsic and extrinsic, remained largely  
326 unexplored. We therefore used HMMs to conduct a formal analysis incorporating multiple  
327 environmental and individual-based variables including the time of day, air temperature, wind  
328 speed, age, body condition and sex. Rather than focusing on animals from a single colony, our  
329 study design incorporated variation in both density and terrain by tracking pups from two  
330 contrasting breeding colonies, while replication across two consecutive seasons also allowed  
331 us to account for inter-annual variation in food availability.

332 Our hourly GPS data revealed a distinct pattern of terrestrial pup movement that has  
333 not been reported in previous studies. Specifically, we documented a star-like pattern  
334 characterised by directed movement away from and subsequent return to a location of low  
335 activity. This appears to be a genuine behavioural pattern rather than an artefact of our  
336 temporal scale of sampling, as GPS locations collected every five minutes from a subset of  
337 individuals revealed a very similar picture (Supplementary Material Figure S4). Star-like  
338 movement patterns are typified by central place foragers, which make round trips between a  
339 central location and a foraging patch [56]. However, as fur seal pups are entirely reliant on  
340 their mothers for food until they moult, repeated movements away from a central location are  
341 unlikely to have anything to do with resource acquisition. Instead, our results appear to be

342 indicative of bouts of exploration within a defined radius around a suckling location, which  
343 would imply that Antarctic fur seal pups are ‘central place explorers’.

344 We would expect central place exploration in fur seal pups to be adaptive given that it  
345 entails energetic costs and may even make it more difficult for pups to be located by their  
346 mothers when they return from foraging trips. We can envisage a number of possible  
347 explanations for this behaviour. First, high levels of activity may facilitate the development of  
348 the muscle mass necessary for future foraging success. Second, movement both within and  
349 beyond the confines of the beach where a pup is born may increase the scope for social  
350 interactions, which might be important for future mating success. Third, a transition from  
351 beach habitats to the tussock grass offers protection against harsh weather conditions and may  
352 reduce the risk of a pup either being crushed by a territorial male or predated.

353

#### 354 *Results of the HMM*

355 We used an HMM framework to infer the discrete behavioural states underlying pup  
356 movement and the probability of switching between these states given certain environmental  
357 and individual covariates. This integrated approach to decompose behavioural patterns has  
358 been applied across a wide range of species and habitats and has emerged as a powerful tool  
359 for animal movement modelling [5]. In our model, we uncovered a strong influence of year,  
360 whereby the probability of occupying the active state was higher in the first breeding season  
361 (2019), particularly for FWB pups. One possible explanation for this pattern could be that  
362 inter-annual differences in movement are adaptive. The first breeding season in our study was  
363 among the worst on record in terms of breeding female numbers, pup birth weights and  
364 foraging trip durations [27], indicating low prey abundance and poor environmental  
365 conditions [57]. Local densities at both colonies were correspondingly below average [27].  
366 Given a greater risk of predation at low density [27], pups might increase their activity to  
367 avoid harassment, pecking injuries and predation by generalist seabirds, such as southern and  
368 northern giant petrels [58]. Alternatively, higher levels of activity could be a consequence of  
369 increased stress hormone levels. As mothers spent more time at sea foraging in 2019, pups  
370 were subjected to longer periods of food deprivation. Such extended bouts of starvation in  
371 pinniped pups have been associated with an increase in glucocorticoids [59], which are known  
372 to increase activity levels in some species [60]. Understanding the interrelationships among  
373 prolonged fasting, glucocorticoids levels and activity in fur seal pups may help to shed further  
374 light on individual responses to environmental challenges.

375 Another clear extrinsic determinant was the time of day, with activity levels peaking  
376 just before solar noon. This observation is in line with a previous study of Galápagos fur seal  
377 pups [17], but otherwise very little is known in general about diurnal patterns of activity  
378 among fur seals while ashore. Daily meter-resolution location data from densely packed  
379 territory holding males reveal negligible movements from day to day [28], implying that these  
380 animals remain more or less stationary. By contrast, telemetry studies on adult female fur  
381 seals correlate nocturnal foraging behaviour with diel variation in the time of arrival and  
382 departure from the breeding colony [61]. Consequently, it is unclear to what extent our results  
383 can be extrapolated across the life history, especially given the likelihood of an ontogenetic  
384 shift in times of peak activity as pups transition from a reliance on milk to nutritional  
385 independence.

386 The HMM also revealed an increase in pup activity with age, but only for pups born at  
387 FWB. One explanation for this colony-specific difference could be that FWB pups are able to  
388 express their full behavioural repertoire throughout the course of ontogeny, becoming more  
389 active as they grow, whereas pups born on SSB are constrained by the high density of  
390 conspecifics. In particular, pups that traverse tightly packed harems on SSB run a higher risk  
391 of being crushed by a territorial male or bitten by a breeding female [20,21]. Alternatively, we  
392 recently found that FWB pups are more likely to be predated by generalist seabirds [27]. This  
393 might translate into an increase of predator-avoidance activity as pups mature, which would  
394 help to explain why activity no longer increases after around 40 days of age, when the  
395 majority of individuals have transitioned to the more sheltered tussock grass [25].

396 In addition to pups from FWB increasing their activity over time, we also found that  
397 they tended to move earlier into the tussock grass than pups from SSB. While this earlier  
398 transition could simply be a consequence of increased activity, it might also be adaptive for  
399 FWB pups to move inland as quickly as possible given the higher risk of predation at low  
400 density [27]. In other words, pups may move into the more sheltered tussock grass earlier in  
401 life to avoid predatory seabirds and might thereafter display a higher propensity for active  
402 movement to offset reduced social interactions in the dense vegetation. However, differences  
403 in the topography of the two colonies might also influence the timing of this transition, as  
404 a steep gully separates the beach at SSB from the tussock grass, while FWB offers a more  
405 gradual transition between the two habitats. To disentangle the effects of density and  
406 topography would require a larger study embracing a greater diversity of breeding colonies.

407 Contrary to our initial expectations, the HMM found little to no effect of air  
408 temperature and wind speed on pup activity. This is surprising given that the pups in our study



409 lacked the water-repellent fur of adults and were thus poorly protected from the elements [22].  
410 Reduced activity [34] and huddling behaviour [36] have been documented in pinniped  
411 neonates as effective thermoregulatory behaviours to withstand the respectively hottest and  
412 coldest daily temperatures, so we anticipated a reduction in pup activity under marginal  
413 weather conditions. However, large variation in temperature was not observed on Bird Island  
414 (2019 mean temperature =  $3.7^{\circ}\text{C} \pm s.d. 1.3$ ; 2020 mean temperature =  $3.9^{\circ}\text{C} \pm s.d. 1.4$ ).  
415 Consequently, behavioural adjustments in activity for effective thermoregulation may not  
416 have been necessary in the specific context of our study. Alternatively, other climatic  
417 variables that we could not account for, such as precipitation or humidity, may have a  
418 disproportionate influence on activity levels. Future studies involving the direct observation  
419 of focal individuals under diverse climatic conditions would shed further light on this topic.

420 The HMM also showed that pup activity levels were largely unaffected by body  
421 condition. This was unexpected because Antarctic fur seal pups rely on their mother's milk  
422 for nutrition before moulting their pelage and must tolerate bouts of starvation lasting up to 11  
423 days while their mothers forage at sea [18]. As a result, pup growth is known to decline with  
424 prolonged maternal absence [62], implying that fewer resources should be available for  
425 movement. Taken at face value, the lack of a relationship between body condition and  
426 movement may suggest that the short-term benefits of high activity, such as muscle mass  
427 development and increased social interaction, may outweigh the costs associated with  
428 diverting resources from growth. This would be in line with a previous study that similarly  
429 found that Galápagos fur seal pups maintained high activity levels throughout bouts of  
430 starvation [17]. However, it is also possible that an effect of body condition could not be  
431 detected in our study because our model assumed that condition was constant between  
432 successive measurements, whereas in practice it will vary to some extent from day to day.

433 Despite a number of studies having shown that sex-specific differences in activity,  
434 habitat use, foraging and diving behaviour are established early in life in several pinniped  
435 species [12–16,63], including Antarctic fur seals [25], our HMM did not uncover any obvious  
436 sex differences in activity. This is probably a consequence of the timeframe of our study.  
437 Jones *et al.* [25], for example, were only able to detect sex-specific differences in habitat use  
438 in Antarctic fur seal pups older than 41 days. Given that we focused on the time window from  
439 birth until moulting at around 60 days of age, the results of the two studies are consistent and  
440 lend support to the notion that sex-specific movement patterns take several weeks to become  
441 established.

442



443 *Results of the post-hoc analysis*

444       Finally, *post-hoc* analysis showed that pups were significantly less active when their  
445 mother was ashore, suggesting that pup activity is correlated to some extent with maternal  
446 foraging behaviour. This association is most likely a reflection of the utmost importance of  
447 milk consumption for pup survival and development. A mother may spend as little as 24  
448 hours and on average only 2 days ashore during each nursing bout [61], so pups must  
449 maximise nutrient uptake during this time. Moreover, adult female fur seals frequently display  
450 aggressive behaviour towards foreign pups [20], potentially limiting a pup's opportunity for  
451 social interactions when the mother is present [17].

452       We also found that pups that died tended to be less active. In our dataset, cause of  
453 death was assigned to all but one pup as either starvation ( $n = 5$ ) or predation ( $n = 6$ ), closely  
454 related determinants given that smaller, weaker pups may be more likely to be predated. One  
455 possible explanation for the reduced activity of pups that died could therefore be related to  
456 poor body condition. While this would appear to contradict the lack of an overall association  
457 between activity and condition in the HMM, it is possible that activity may decline only after  
458 body condition falls below a critical threshold [17], an effect we may not have captured due to  
459 the small number ( $n = 13$ ) and early occurrence (median = 15 days) of mortalities in our  
460 dataset. Alternatively, causality could flow in the other direction, with less active pups being  
461 more likely to be predated. This would be more in line with our HMM results as well as with  
462 the hypothesis that increased activity is related to predator-avoidance behaviour.

463

464 *Conclusions*

465       We document the movement behaviour and activity levels of Antarctic fur seal pups  
466 between birth and moulting in relation to a multitude of extrinsic and intrinsic explanatory  
467 variables. Our findings suggest that during this early life stage, pup activity is mainly shaped  
468 by extrinsic factors including year, time of day and colony of birth. In contrast to a previous  
469 study of activity later in life [25], we found little effect of intrinsic factors such as body  
470 condition and sex. Our study therefore highlights the importance of external influences during  
471 this critical phase of life when pups are at their greatest risk of predation and have not yet  
472 developed their water-repellent adult coat.

473 **Data Availability Statement**

474 Raw data will be uploaded to the Dryad Digital Repository upon acceptance of this  
475 manuscript. R code is available as a R Markdown file and included in the Supplementary  
476 material.

477

478 **Acknowledgements**

479 The authors would like to thank Ana Bertoldi Carneiro, Freya Blockley, Jamie Coleman,  
480 Alexandra Dodds, Vicki Foster, Derren Fox, Iain Angus Gordon, Pauline Goulet, Rosie Hall,  
481 Cary Jackson, Adam Lowndes, Elizabeth Morgan, Rachael Orben, Jessica Ann Philips, David  
482 Reid and Mark Whiffin for help in the field.

483

484 **Author contributions**

485 RN, CS, CF-C and CT collected the data. SM and TA built the HMM models. JIH, RL and JF  
486 conceived of the study and contributed funding and materials. All of the authors commented  
487 on and approved the final manuscript.

488

489 **Funding**

490 This research was funded by the German Research Foundation (DFG) as part of the SFB TRR  
491 212 (NC<sup>3</sup>) – Project numbers 316099922, 396774617 and 396782756. It was also supported  
492 by core funding from the Natural Environment Research Council to the British Antarctic  
493 Survey's Ecosystems Program.

494 **References**

- 495 1. Liedvogel M, Chapman BB, Muheim R, Åkesson S. 2013 The behavioural ecology of  
496 animal movement: reflections upon potential synergies. *Anim. Migr.* , 39–46.  
497 (doi:10.2478/ami-2013-0002)
- 498 2. Crossin GT, Cooke SJ, Goldbogen JA, Phillips RA. 2014 Tracking fitness in marine  
499 vertebrates: Current knowledge and opportunities for future research. *Mar. Ecol. Prog.  
500 Ser.* **496**, 1–17. (doi:10.3354/meps10691)
- 501 3. Hays GC *et al.* 2016 Key questions in marine megafauna movement ecology. *Trends  
502 Ecol. Evol.* **31**, 463–475. (doi:10.1016/j.tree.2016.02.015)
- 503 4. Hussey NE *et al.* 2015 Aquatic animal telemetry: A panoramic window into the  
504 underwater world. *Science (80-. )*. **348**, 1255642. (doi:10.1126/science.1255642)
- 505 5. Zucchini W, MacDonald IL, Langrock R. 2016 *Hidden Markov models for time series:  
506 An introduction using R*. Boca Raton: Chapman and Hall/CRC.
- 507 6. Sequeira AMM *et al.* 2018 Convergence of marine megafauna movement patterns in  
508 coastal and open oceans. *Proc. Natl. Acad. Sci. U. S. A.* **115**, 3072–3077.  
509 (doi:10.1073/pnas.1716137115)
- 510 7. McIntyre T. 2014 Trends in tagging of marine mammals: A review of marine mammal  
511 biologging studies. *African J. Mar. Sci.* **36**, 409–422.  
512 (doi:10.2989/1814232X.2014.976655)
- 513 8. Pardo D, Forcada J, Wood AG, Tuck GN, Ireland L, Pradel R, Croxall JP, Phillips RA.  
514 2017 Additive effects of climate and fisheries drive ongoing declines in multiple  
515 albatross species. *Proc. Natl. Acad. Sci. U. S. A.* **114**, E10829–E10837.  
516 (doi:10.1073/pnas.1618819114)
- 517 9. Watson JW, Epperly SP, Shah AK, Foster DG. 2005 Fishing methods to reduce sea  
518 turtle mortality associated with pelagic longlines. *Can. J. Fish. Aquat. Sci.* **62**, 965–  
519 981. (doi:10.1139/f05-004)
- 520 10. Daunt F, Afanasyev V, Adam A, Croxall JP, Wanless S. 2007 From cradle to early  
521 grave: Juvenile mortality in European shags *Phalacrocorax aristotelis* results from  
522 inadequate development of foraging proficiency. *Biol. Lett.* **3**, 371–374.  
523 (doi:10.1098/rsbl.2007.0157)
- 524 11. Kernaléguen L, Arnould JPY, Guinet C, Cazelles B, Richard P, Cherel Y. 2016 Early-  
525 life sexual segregation: Ontogeny of isotopic niche differentiation in the Antarctic fur  
526 seal. *Sci. Rep.* **6**, 33211. (doi:10.1038/srep33211)
- 527 12. Leung ES, Chilvers BL, Nakagawa S, Robertson BC. 2014 Size and experience matter:

- 528 Diving behaviour of juvenile New Zealand sea lions (*Phocarctos hookeri*). *Polar Biol.*  
529 **37**, 15–26. (doi:10.1007/s00300-013-1405-6)
- 530 13. Bishop A, Brown C, Rehberg M, Torres L, Horning M. 2018 Juvenile Steller sea lion  
531 (*Eumetopias jubatus*) utilization distributions in the Gulf of Alaska. *Mov. Ecol.* **6**, 1–  
532 15. (doi:10.1186/s40462-018-0124-6)
- 533 14. Zeppelin T, Pelland N, Sterling J, Brost B, Melin S, Johnson D, Lea MA, Ream R.  
534 2019 Migratory strategies of juvenile northern fur seals (*Callorhinus ursinus*): Bridging  
535 the gap between pups and adults. *Sci. Rep.* **9**, 1–16. (doi:10.1038/s41598-019-50230-z)
- 536 15. Carter MID, McClintock BT, Embling CB, Bennett KA, Thompson D, Russell DJF.  
537 2019 From pup to predator: generalized hidden Markov models reveal rapid  
538 development of movement strategies in a naïve long-lived vertebrate. *Oikos* **129**, 630–  
539 642. (doi:10.1111/oik.06853)
- 540 16. Gentry RL. 1974 The development of social behavior through play in the Steller sea  
541 lion. *Am. Zool.* **14**, 391–403. (doi:10.1093/icb/14.1.391)
- 542 17. Arnold W, Trillmich F. 1985 Time budget in Galápagos fur seal pups: The influence of  
543 the mother's presence and absence on pup activity and play. *Behaviour* **92**, 302–321.
- 544 18. Forcada J, Staniland IJ. 2018 Antarctic Fur Seal. In *Encyclopedia of Marine Mammals*  
545 (eds B Würsig, JGM Thewissen, KM Kovacs), pp. 25–27. Academic Press.  
546 (doi:10.1016/b978-0-12-804327-1.00046-7)
- 547 19. Hunter S. 1983 The food and feeding ecology of the giant petrels *Macronectes halli*  
548 and *M. giganteus* at South Georgia. *J. Zool.* **200**, 521–538. (doi:10.1111/j.1469-  
549 7998.1983.tb02813.x)
- 550 20. Doidge DW, Croxall JP, Baker JR. 1984 Density-dependent pup mortality in the  
551 Antarctic fur seal *Arctocephalus gazella* at South Georgia. *J. Zool. London* **202**, 449–  
552 460. (doi:10.1111/j.1469-7998.1984.tb05095.x)
- 553 21. Reid K, Forcada J. 2005 Causes of offspring mortality in the Antarctic fur seal,  
554 *Arctocephalus gazella*: The interaction of density dependence and ecosystem  
555 variability. *Can. J. Zool.* **83**, 604–609. (doi:10.1139/z05-045)
- 556 22. Irving L, Peyton LJ, Bahn CH, Peterson RS. 1962 Regulation of temperature in fur  
557 seals. *Physiol. Zool.* **35**, 275–284.
- 558 23. McCafferty DJ, Boyd IL, Taylor RI. 1998 Diving behaviour of Antarctic fur seal  
559 (*Arctocephalus gazella*) pups. *Can. J. Zool.* **76**, 513–520. (doi:10.1139/z97-219)
- 560 24. Payne MR. 1979 Growth in the Antarctic fur seal *Arctocephalus gazella*. *J. Zool.*  
561 *London* **187**, 1–20.

- 562 25. Jones KA, Wood H, Jonathan P, Ratcliffe N, Votier SC, Staniland IJ. 2020 Risk  
563 exposure trade-offs in the ontogeny of sexual segregation in Antarctic fur seal pups.  
564 *Behav. Ecol.* , 1–12. (doi:10.1093/beheco/araa018)
- 565 26. Hunt GL, Heinemann D, Everson I. 1992 Distributions and predator-prey interactions  
566 of macaroni penguins, Antarctic fur seals, and Antarctic krill near Bird Island, South  
567 Georgia. *Mar. Ecol. Prog. Ser.* **86**, 15–30. (doi:10.3354/meps086015)
- 568 27. Nagel R, Stainfield C, Fox-Clarke C, Toscani C, Forcada J, Hoffman JI. 2021 Evidence  
569 for an Allee effect in a declining fur seal population. *Proc. R. Soc. B*  
570 (doi:10.1098/rspb.2020-2882)
- 571 28. Hoffman JI, Trathan PN, Amos W. 2006 Genetic tagging reveals extreme site fidelity  
572 in territorial male Antarctic fur seals *Arctocephalus gazella*. *Mol. Ecol.* **15**, 3841–3847.  
573 (doi:10.1111/j.1365-294X.2006.03053.x)
- 574 29. Forcada J, Hoffman JI. 2014 Climate change selects for heterozygosity in a declining  
575 fur seal population. *Nature* **511**, 462–465. (doi:10.1038/nature13542)
- 576 30. Photopoulou T, Heerah K, Pohle J, Boehme L. 2020 Sex-specific variation in the use of  
577 vertical habitat by a resident Antarctic top predator. *Proc. R. Soc. B* **287**, 20201447.  
578 (doi:10.1098/rspb.2020.1447)
- 579 31. Jones KA, Ratcliffe N, Votier SC, Newton J, Forcada J, Dickens J, Stowasser G,  
580 Staniland IJ. 2020 Intra-specific niche partitioning in Antarctic fur seals, *Arctocephalus*  
581 *gazella*. *Sci. Rep.* **10**, 3238. (doi:10.1038/s41598-020-59992-3)
- 582 32. Le Boeuf BJ, Crocker DE, Blackwell SB, Morris P a, Thorson PH. 1993 Sex  
583 differences in diving and foraging behaviour of northern elephant seals. *Symp. Zool.*  
584 *Soc. London* **66**, 149–178.
- 585 33. Hassrick JL, Crocker DE, Teutschel NM, McDonald BI, Robinson RW, Simmons SE,  
586 Costa DR. 2010 Condition and mass impact oxygen stores and dive duration in adult  
587 female northern elephant seals. *J. Exp. Biol.* **213**, 585–592. (doi:10.1242/jeb.037168)
- 588 34. Limberger D, Trillmich F, Biebach H, Stevenson RD. 1986 Temperature regulation and  
589 microhabitat choice by free-ranging Galapagos fur seal pups (*Arctocephalus*  
590 *galapagoensis*). *Oecologia* **69**, 53–59. (doi:10.1007/BF00399037)
- 591 35. Campagna C, Le Boeuf BJ. 1988 Thermoregulatory behaviour of southern sea lions  
592 and its effect on mating strategies. *Behaviour* **107**, 72–90.  
593 (doi:10.1163/156853988X00205)
- 594 36. Gentry RL. 1973 Thermoregulatory behavior of eared seals. *Behaviour* **46**, 73–93.
- 595 37. Croxall JP, McCann TS, Prince PA, Rothery P. 1988 Reproductive performance of

- 596 seabirds and seals at South Georgia and Signy Island, South Orkney Islands, 1976–  
597 1987: Implications for Southern Ocean monitoring studies. In *Antarctic Ocean and*  
598 *Resources Variability* (ed D Sahrhage), pp. 261–285. Springer, Berlin, Heidelberg.  
599 (doi:10.1007/978-3-642-73724-4\_23)
- 600 38. Boyd IL, Arnould JPY, Barton T, Croxall JP. 1994 Foraging behaviour of Antarctic fur  
601 seals during periods of contrasting prey abundance. *J. Anim. Ecol.* **63**, 703–713.  
602 (doi:10.2307/5235)
- 603 39. Peig J, Green AJ. 2009 New perspectives for estimating body condition from  
604 mass/length data: The scaled mass index as an alternative method. *Oikos* **118**, 1883–  
605 1891. (doi:10.1111/j.1600-0706.2009.17643.x)
- 606 40. Trites AW, Jonker RAH. 2000 Morphometric measurements and body conditions of  
607 healthy and starveling Steller sea lion pups (*Eumetopias jubatus*). *Aquat. Mamm.* **26.2**,  
608 151–157.
- 609 41. Guinet C, Roux JP, Bonnet M, Mison V. 1998 Effect of body size, body mass, and  
610 body condition on reproduction of female South African fur seals (*Arctocephalus*  
611 *pusillus*) in Namibia. *Can. J. Zool.* **76**, 1418–1424. (doi:10.1139/z98-082)
- 612 42. Gentry RL, Holt JR. 1982 Equipment and techniques for handling northern fur seals.  
613 *NOAA Tech. Rep. NMFS SSRF-758*.
- 614 43. Meseck K, Jankowska MM, Schipperijn J, Natarajan L, Godbole S, Carlson J,  
615 Takemoto M, Crist K, Kerr J. 2016 Is missing geographic positioning system data in  
616 accelerometry studies a problem, and is imputation the solution? *Geospat. Health* **11**,  
617 157–163. (doi:10.4081/gh.2016.403)
- 618 44. Michelot T, Langrock R, Patterson TA. 2016 moveHMM: An R package for the  
619 statistical modelling of animal movement data using hidden Markov models. *Methods*  
620 *Ecol. Evol.* **7**, 1308–1315. (doi:10.1111/2041-210X.12578)
- 621 45. R Core Team. 2019 R: A language and environment for statistical computing.
- 622 46. RStudio Team. 2020 RStudio: Integrated development environment for R.
- 623 47. Roeleke M, Blohm T, Hoffmeister U, Marggraf L, Schlägel UE, Teige T, Voigt CC.  
624 2020 Landscape structure influences the use of social information in an insectivorous  
625 bat. *Oikos* **129**, 912–923. (doi:10.1111/oik.07158)
- 626 48. van Beest FM *et al.* 2019 Classifying grey seal behaviour in relation to environmental  
627 variability and commercial fishing activity - a multivariate hidden Markov model. *Sci.*  
628 *Rep.* **9**, 5642. (doi:10.1038/s41598-019-42109-w)
- 629 49. Towner A V., Leos-Barajas V, Langrock R, Schick RS, Smale MJ, Kaschke T, Jewell



- 630 OJD, Papastamatiou YP. 2016 Sex-specific and individual preferences for hunting  
631 strategies in white sharks. *Funct. Ecol.* **30**, 1397–1407. (doi:10.1111/1365-2435.12613)
- 632 50. Grecian WJ, Lane J V., Michelot T, Wade HM, Hamer KC. 2018 Understanding the  
633 ontogeny of foraging behaviour: Insights from combining marine predator bio-logging  
634 with satellite-derived oceanography in hidden Markov models. *J. R. Soc. Interface* **15**,  
635 20180084. (doi:10.1098/rsif.2018.0084)
- 636 51. Schwarz JFL, Mews S, DeRango EJ, Langrock R, Piedrahita P, Páez-Rosas D, Krüger  
637 O. 2021 Individuality counts: A new comprehensive approach to foraging strategies of  
638 a tropical marine predator. *Oecologia* (doi:10.1007/s00442-021-04850-w)
- 639 52. Pohle J, Langrock R, van Beest FM, Schmidt NM. 2017 Selecting the number of states  
640 in hidden Markov models: Pragmatic solutions illustrated using animal movement. *J.*  
641 *Agric. Biol. Environ. Stat.* **22**, 270–293. (doi:10.1007/s13253-017-0283-8)
- 642 53. Patterson TA, Basson M, Bravington M V., Gunn JS. 2009 Classifying movement  
643 behaviour in relation to environmental conditions using hidden Markov models. *J.*  
644 *Anim. Ecol.* **78**, 1113–1123. (doi:10.1111/j.1365-2656.2009.01583.x)
- 645 54. Bates D, Mächler M, Bolker B, Walker S. 2015 Fitting linear mixed-effects models  
646 using lme4. *J. Stat. Softw.* **67**, 1–48. (doi:10.18637/jss.v067.i01)
- 647 55. Hartig F. 2020 DHARMA: Residual diagnostics for hierarchical (multi-level/ mixed)  
648 regression models. , <http://florianhartig.github.io/DHARMA/>.
- 649 56. Bell WJ. 1990 Central place foraging. In *Searching Behaviour*, pp. 171–187. Springer,  
650 Dordrecht. (doi:10.1007/978-94-011-3098-1\_12)
- 651 57. Forcada J, Trathan PN, Reid K, Murphy EJ. 2005 The effects of global climate  
652 variability in pup production of Antarctic fur seals. *Ecology* **86**, 2408–2417.  
653 (doi:10.2307/3451030)
- 654 58. Gianuca D *et al.* 2019 Sex-specific effects of fisheries and climate on the demography  
655 of sexually dimorphic seabirds. *J. Anim. Ecol.* **88**, 1366–1378. (doi:10.1111/1365-  
656 2656.13009)
- 657 59. Ortiz RM, Wade CE, Ortiz CL. 2001 Effects of prolonged fasting on plasma cortisol  
658 and TH in postweaned northern elephant seal pups. *Am. J. Physiol. - Regul. Integr.*  
659 *Comp. Physiol.* **280**, R790–R795. (doi:10.1006/gcen.2000.7514)
- 660 60. Crossin GT, Trathan PN, Phillips RA, Gorman KB, Dawson A, Sakamoto KQ,  
661 Williams TD. 2012 Corticosterone predicts foraging behavior and parental care in  
662 macaroni penguins. *Am. Nat.* **180**, E31–E41. (doi:10.1086/666001)
- 663 61. Boyd IL, Lunn NJ, Barton T. 1991 Time budgets and foraging characteristics of

- 664 lactating Antarctic fur seals. *J. Anim. Ecol.* **60**, 577–592. (doi:10.2307/5299)
- 665 62. Lunn NJ, Boyd IL, Barton T, Croxall JP. 1993 Factors affecting the growth rate and  
666 mass at weaning of Antarctic fur seals at Bird Island, South Georgia. *J. Mammal.* **74**,  
667 908–919. (doi:10.2307/1382429)
- 668 63. Warren NL, Trathan PN, Forcada J, Fleming A, Jessopp MJ. 2006 Distribution of post-  
669 weaning Antarctic fur seal *Arctocephalus gazella* pups at South Georgia. *Polar Biol.*  
670 **29**, 179–188. (doi:10.1007/s00300-005-0037-x)



671 **Tables**

672 Table 1: Differences in AIC values ( $\Delta$ AIC) between the full model and HMMs sequentially  
 673 excluding each variable and its interaction term with colony.

| Covariate   | Exclude                 | AIC      | $\Delta$ AIC | 674<br>675 |
|-------------|-------------------------|----------|--------------|------------|
| all         |                         | 592365   |              | 676        |
| sex         | Interaction with colony | 592368.9 | 3.9          | 677        |
|             | all terms               | 592366.3 | 1.3          | 678        |
| age         | interaction with colony | 592443.7 | 78.7         | 679        |
|             | all terms               | 592534.6 | 169.6        | 680        |
| body        | interaction with colony | 592370.4 | 5.4          | 681        |
| condition   | all terms               | 592386.5 | 21.5         | 682        |
| time of day | interaction with colony | 592377.7 | 12.7         | 683        |
|             | all terms               | 592535.4 | 170.4        | 684        |
| season      | interaction with colony | 592408.9 | 43.9         | 685        |
|             | all terms               | 592418.4 | 53.4         | 686        |
| temperature | interaction with colony | 592367.5 | 2.5          | 687        |
|             | all terms               | 592367.8 | 2.8          | 688        |
| wind speed  | interaction with colony | 592362.1 | -2.9         | 689        |
|             | all terms               | 592360.1 | -4.9         | 690        |
| colony      | all terms               | 592557.5 | 192.5        | 691<br>692 |

693

694 **Figures**

695 Figure 1: VHF monitoring and GPS tracking. (a) VHF transmitters for pups (top) and mothers  
696 (bottom) were temporarily attached to the dorsal side of the neck between the shoulder blades  
697 with epoxy glue. GPS loggers in waterproof ABS plastic enclosures were similarly fitted to  
698 pups. Tag specifications: Sirtrack core marine glue-on V2G 152A, 40 x 20 x 10 mm body  
699 with 200 mm antenna, weight 16 g; Sirtrack core marine glue-on V2G 154C, 65 x 28 x 13  
700 mm body with 250 mm antenna, weight 42 g; Perthold Engineering CatLog Gen2 GPS  
701 Loggers, 50 x 40 x 17 mm, weight 36 g. (b) Antarctic fur seal mother-pup pair. VHF  
702 transmitters are visible on both individuals, while the pup has additionally been fitted with a  
703 GPS logger and given a temporary bleach mark for identification. Unrecovered tags and  
704 bleach marks shed naturally with the pelage moult during March to April, precluding any  
705 long-term consequences for the animals. Photo credit: Claire Stainfield.

706

707 Figure 2: Movement patterns of Antarctic fur seal pups on Bird Island, South Georgia (see  
708 inset). (a) Location of the two fur seal breeding colonies from which pups were tagged with  
709 GPS loggers. Freshwater Beach (FWB) and Special Study Beach (SSB) are separated by  
710 approximately 200 meters. (b) Decoded states from the HMM showing the inferred activity  
711 patterns of 66 pups throughout ontogeny. Pups tended to exhibit star-like movement patterns,  
712 with directed movement away from and subsequent return to a central location of low activity.  
713 (c) GPS locations recorded throughout ontogeny for 32 pups born on FWB and 34 pups born  
714 on SSB. Animals from FWB stayed relatively close to their colony of birth, whereas SSB  
715 pups often moved farther inland. To aid visibility, each panel is a magnified view of Bird  
716 Island (longitude range = -38.060: -38.045, latitude range= -54.014: -54.005) and  
717 consequently, some decoded states and GPS points recorded outside this frame are not visible.  
718 For a complete map of the entire island showing all recorded states and positions, see  
719 Supplementary Material Figure S1. For representative examples of individual GPS tracks,  
720 including one pup from each breeding colony and season, see Supplementary Material Figure  
721 S2.

722

723 Figure 3: (a–d) Mean probability ( $\pm$  95% confidence interval) of being in an ‘active’  
724 behavioural state as a function of the covariates included in the HMM. Probabilities were  
725 calculated for each covariate and state by fixing the other covariates to their respective means  
726 or reference categories. Confidence intervals for the probabilities were obtained based on  
727 Monte Carlo simulation from the estimators’ approximate distribution as implied by

728 maximum likelihood theory. (a, b) Pups from both breeding colonies exhibit diurnal  
729 movement patterns characterised by a higher probability of being active during the day. (c, d)  
730 The probability of being in an active state gradually increased from birth to nutritional  
731 independence for FWB pups, while SSB pups showed similar levels of activity throughout  
732 ontogeny. (e, f) FWB pups moved away from their colony of birth and inland into the tussock  
733 grass behind the beach habitat earlier, whereas pups at SSB tended to transition to the tussock  
734 grass later in ontogeny.

735

736 Figure 4: Results of post-hoc analyses. (a) Pups were less active when their mothers were  
737 present on the island; (b) Pups that died spent less time overall in the active state. Sample  
738 sizes ( $n$ ), GLMM slope estimates and  $p$ -values are provided.

739 **Supplementary material**

740

741 Figure S1: Map of Bird Island, South Georgia, showing all recorded GPS positions and states.

742

743 Figure S2: Representative examples of individual GPS tracks, including one pup from each  
744 breeding colony and season.

745

746 Figure S3: The number of states in an HMM must be specified before running the model and  
747 only models with a biologically meaningful numbers of states should be tested. We expected  
748 Antarctic fur seal pup movement to include a resting state (short step-lengths), an active state  
749 (long step-lengths with more directed movement) and potentially a local exploration state  
750 (moderate step-lengths with high degrees of turning). Thus, we evaluated HMMs with two  
751 and three movement states, respectively. We also compared univariate HMMs to bivariate  
752 HMMs that included the turning angle between consecutive GPS locations. The marginal  
753 distribution under the fitted model and the empirical distribution is shown. In the 3-state  
754 HMM, the states' distributions of both the step length and especially the turning angle  
755 overlapped greatly and did not allow us to adequately distinguish the active from the local  
756 exploration state. The distribution of the turning angle in the 2-state bivariate HMM was the  
757 same for both states and therefore did not add any information to the model. Overall, neither  
758 the additional state (three rather than two) nor the inclusion of the turning angle resulted in a  
759 significant improvement of model fit. We therefore restricted our final analysis to a  
760 parsimonious univariate HMM with two states.

761

762 Figure S4: HMMs fitted to 5-minute interval GPS data collected from three fur seal pups,  
763 each between 30 – 50 days of age, for 13 – 19 days (mean = 3,965 data points). We evaluated  
764 HMMs with two and three movement states. With respect to the aims of our study, there is no  
765 relevant loss of information on pup activity by using the coarser temporal resolution (hourly  
766 data).

767

768 Figure S5: Pseudo-residuals of the final HMM.

769

770 R Markdown



a

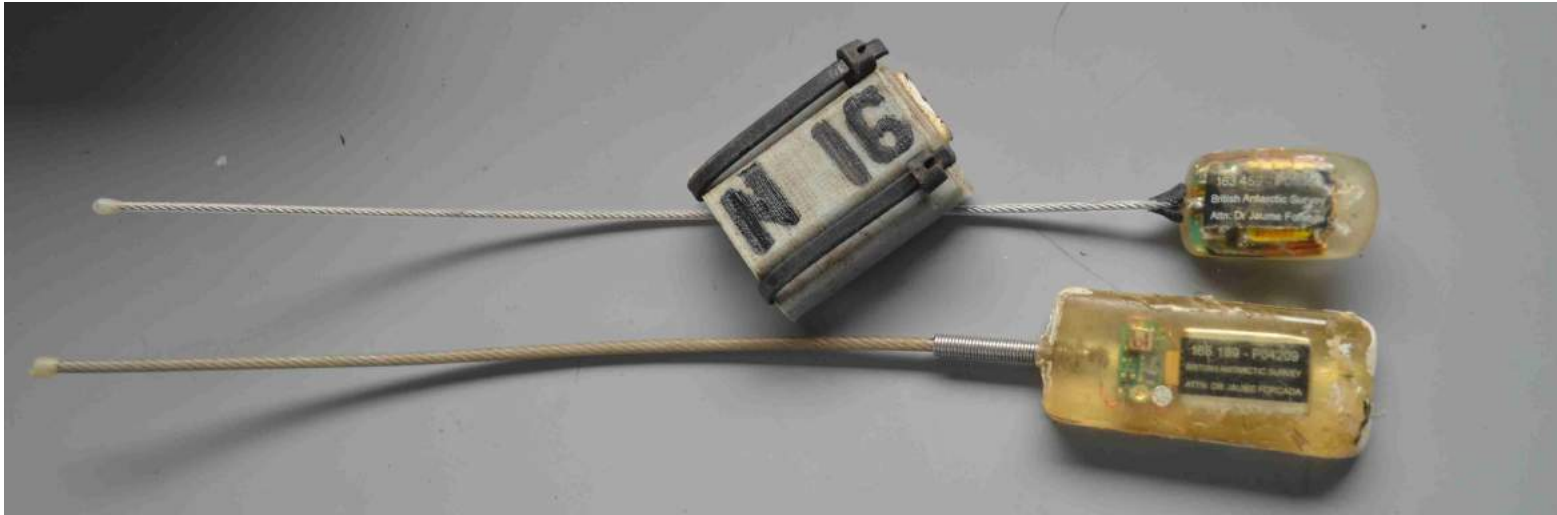

b

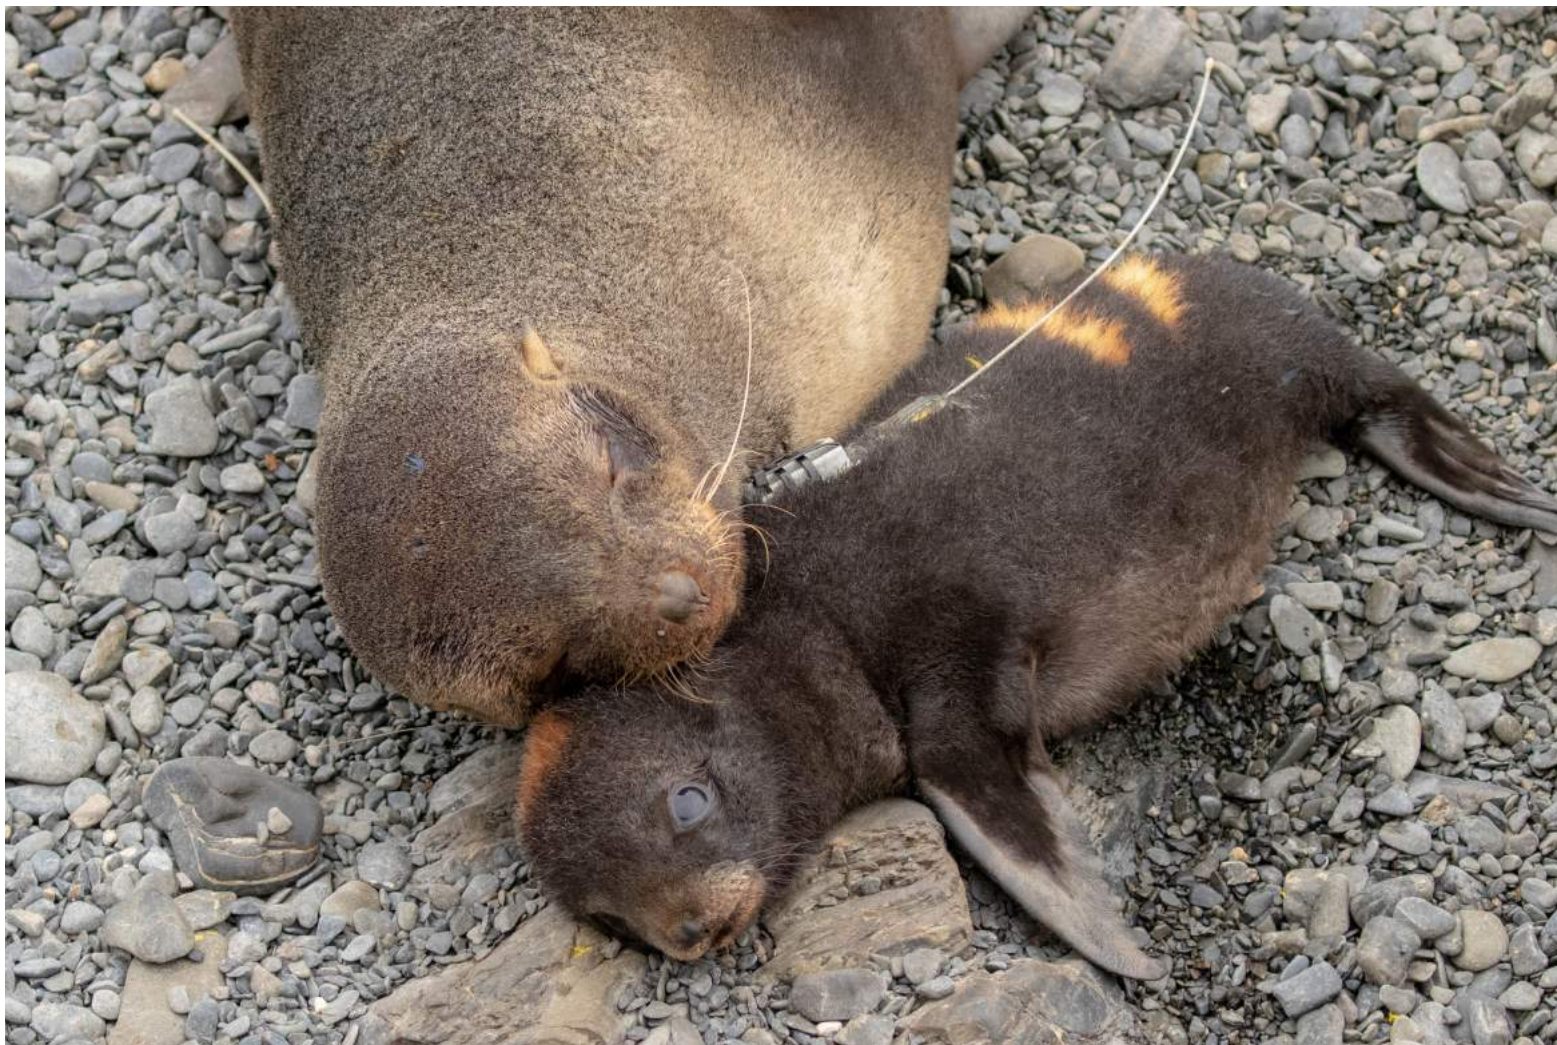

a

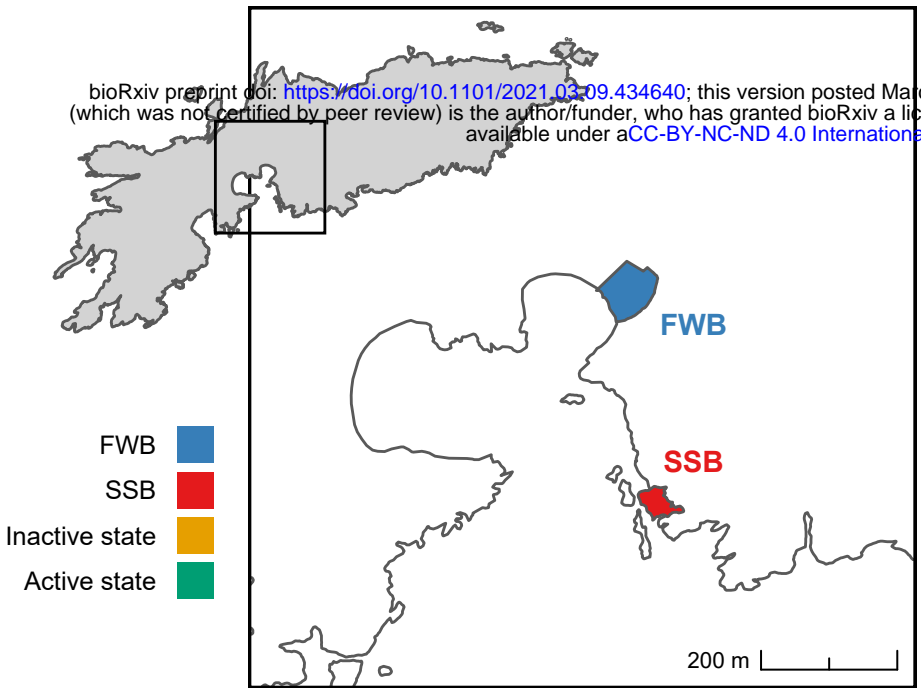

b

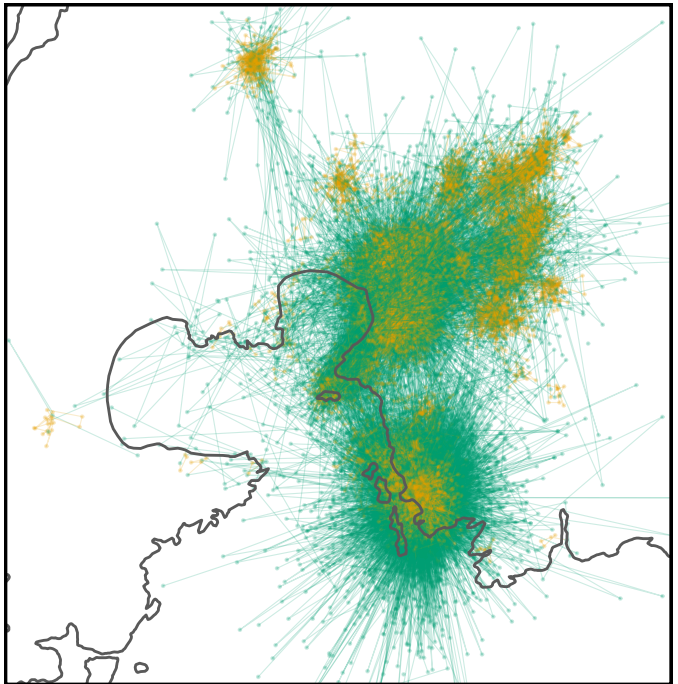

c

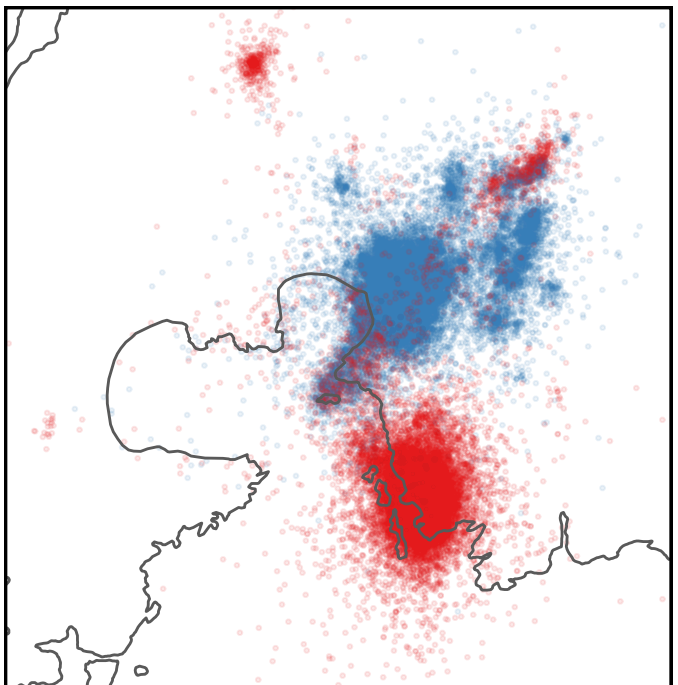

**a**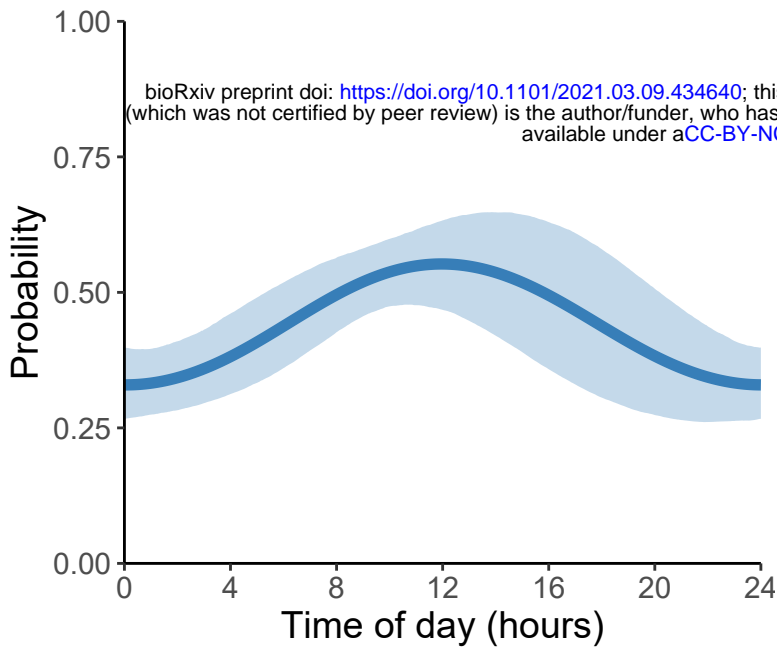**b**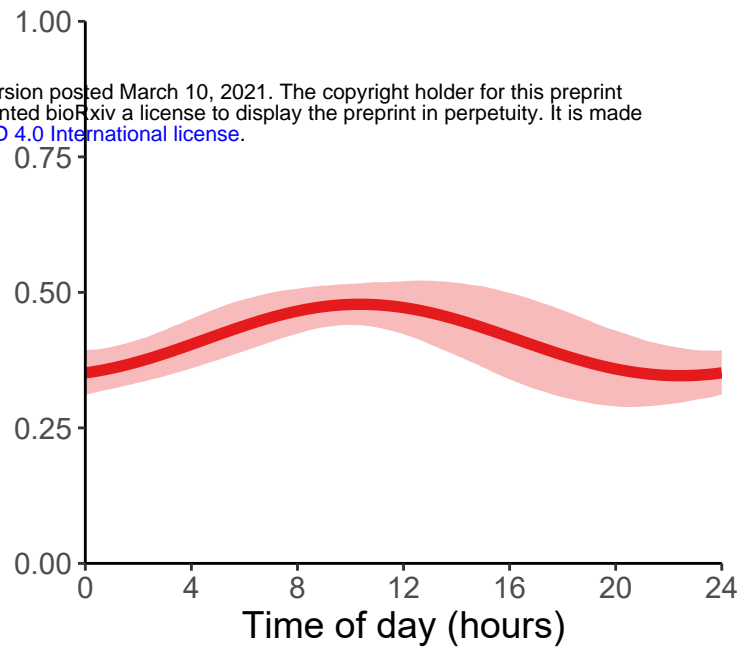**c**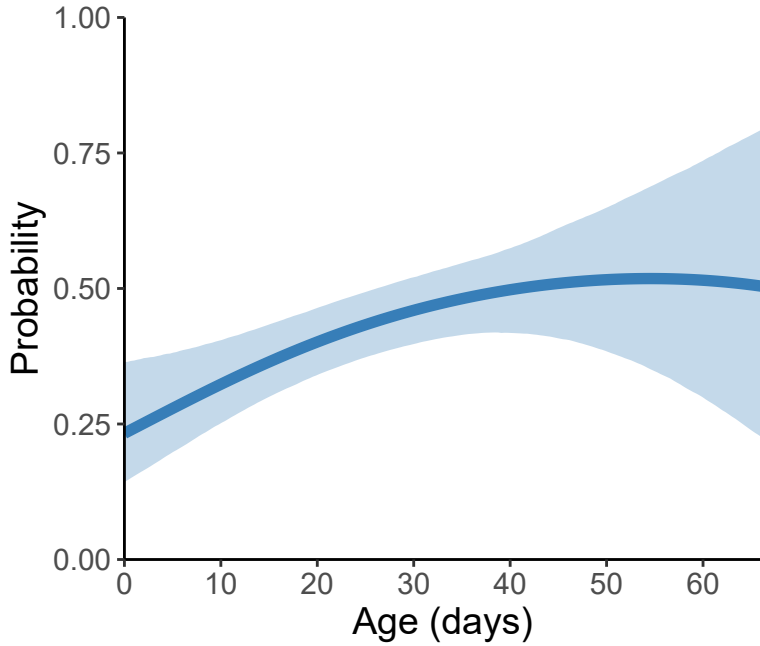**d**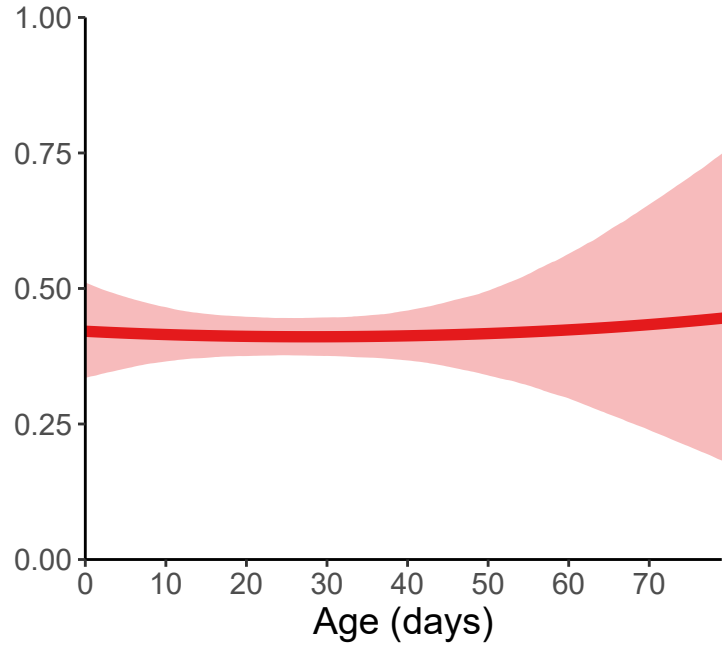**e**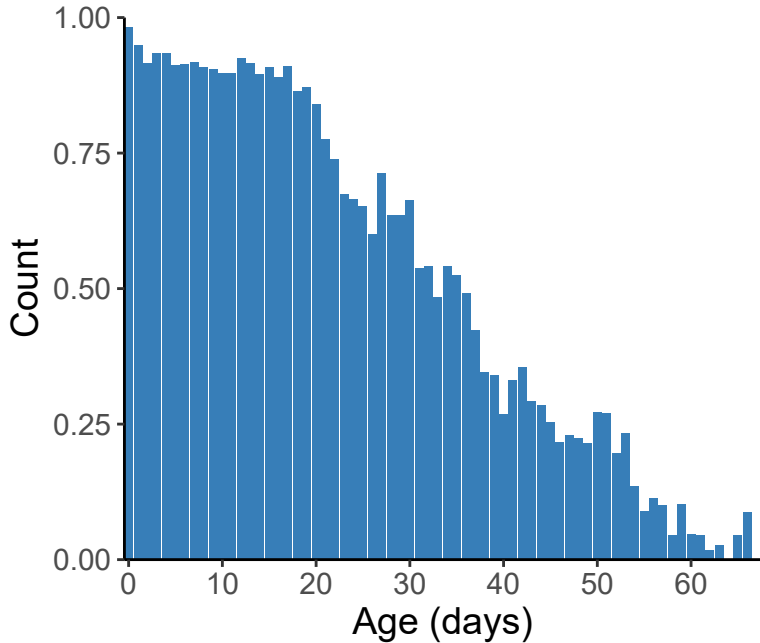**f**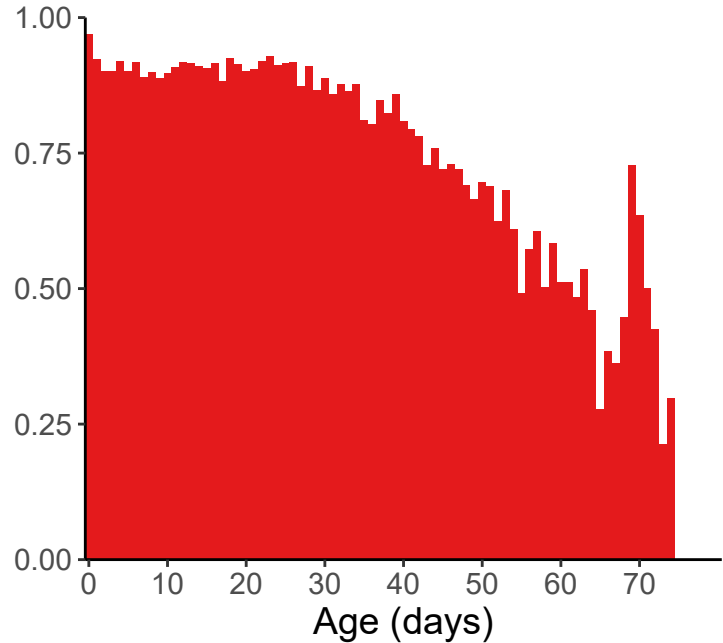FWB ■ ■ SSB

**a** $n = 24$ , estimate = -0.091,  $p = 0.03$ 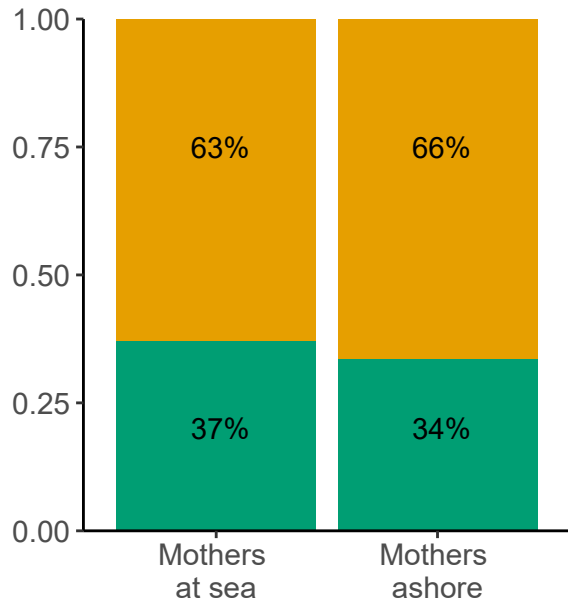**b** $n = 66$ , estimate = -0.758,  $p < 0.001$ 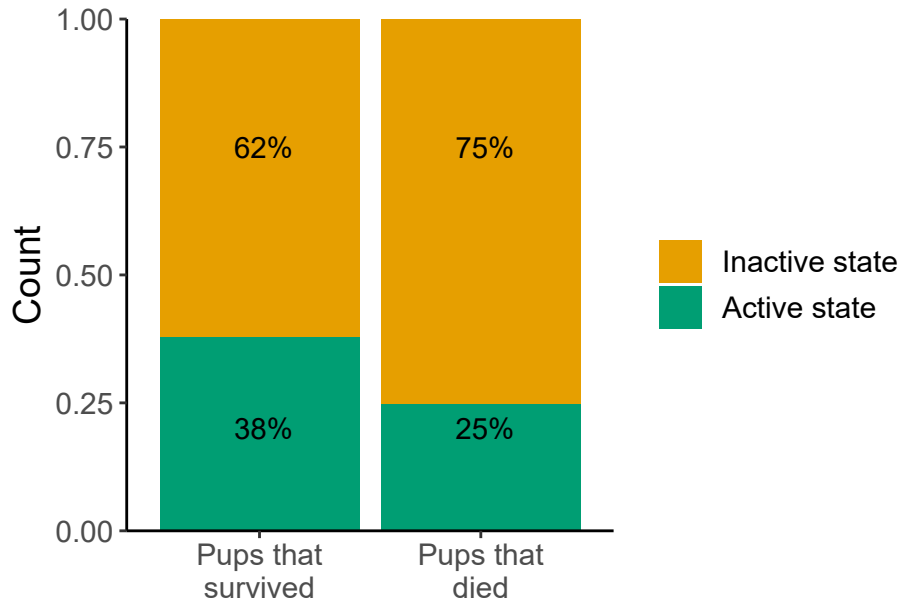

Source: https://www.biorxiv.org/content/10.1101/2021.03.09.434640v1.full.pdf
